# Supplementary material for: Stabilizing Salt-Bridge Enhances Protein Thermostability by Reducing the Heat Capacity Change of Unfolding
Source: PLOS journal article supplement (doi:10.1371/journal.pone.0021624), 2011-06-24
Supplement: S2 (10.1371/journal.pone.0021624.s002) [file journal.pone.0021624.s002]

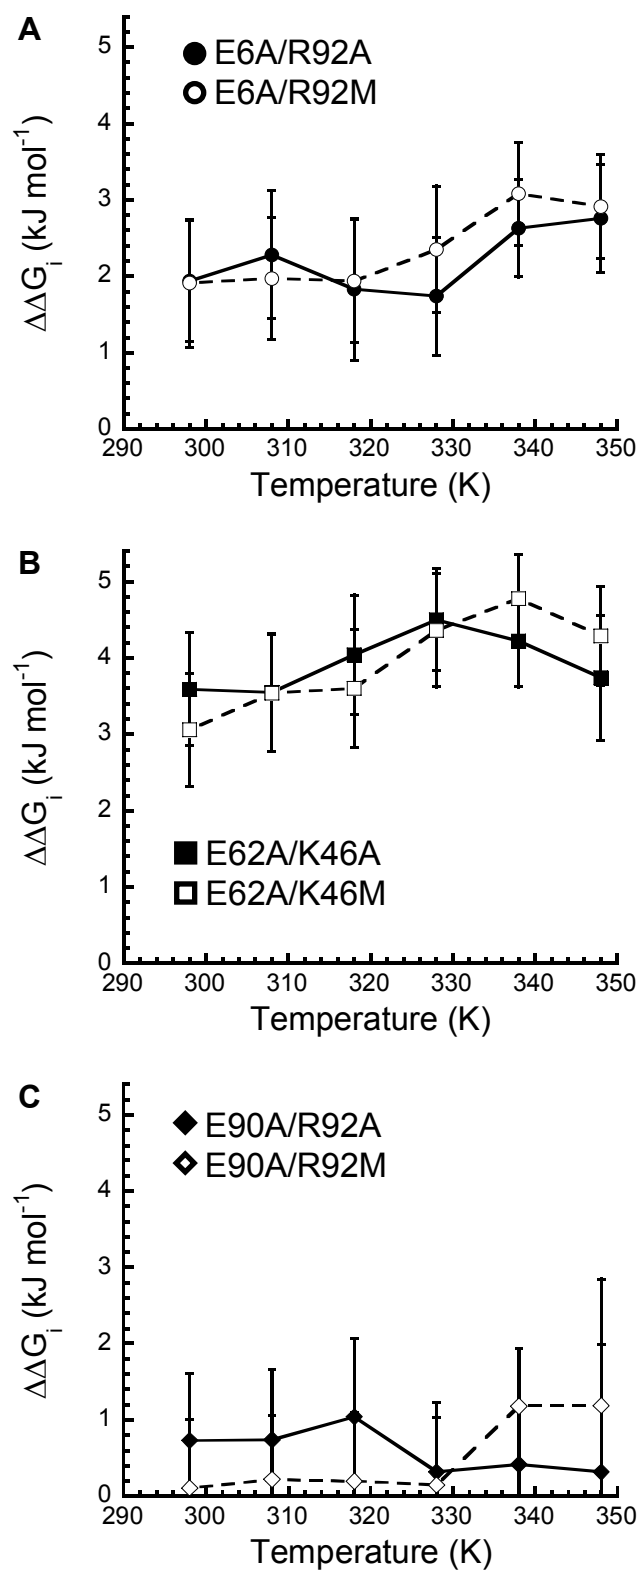

Figure S2. Temperature dependency of the coupling energy. Values of  $\Delta\Delta G_{\text{int}}$  derived from double-mutant cycles (A) E6A/R92A(M) (circles), (B) E62A/K46A(M) (squares), and (C) E90A/R92A(M) (diamonds) at temperatures 298 K to 348 K are shown. Values of  $\Delta\Delta G_{\text{int}}$  derived from the R/K→A cycles are represented by filled symbols, and those from the R/K→M cycles by open symbols.
